# Supplementary material
Source: Springer Nature journal article supplement (https://www.springermedizin.de/resource/supplementary/12889_2012_4924_MOESM1_ESM.pdf/9495260)
Supplement: MOESM1 [file 9495260]

## Enrollment

Assessed for eligibility (n=2490)

Excluded (n= 2266)

- Not meeting inclusion criteria (n=2238)
- Declined to participate (n=28)

Randomized (n=224)

## Allocation

Allocated to Intervention group-1 (n=112)  
◆ Received allocated intervention (n=112)

Allocated to Intervention group-2 (n=112)  
◆ Received allocated intervention (n=112)

## Follow-Up at 6 months

Drop out (n=14)

Migration – 6, Inconvenience to attend on the follow-up day -5, Lost to follow up - 3

Drop out (n=14)

Migration – 4, Inconvenience to attend on the follow-up day -5, Lost to follow up -5

## Analysis

Analysed (n=98)

Analysed (n=98)
